# Supplementary material
Source: PubMed Central journal article supplement (PMC3887393)

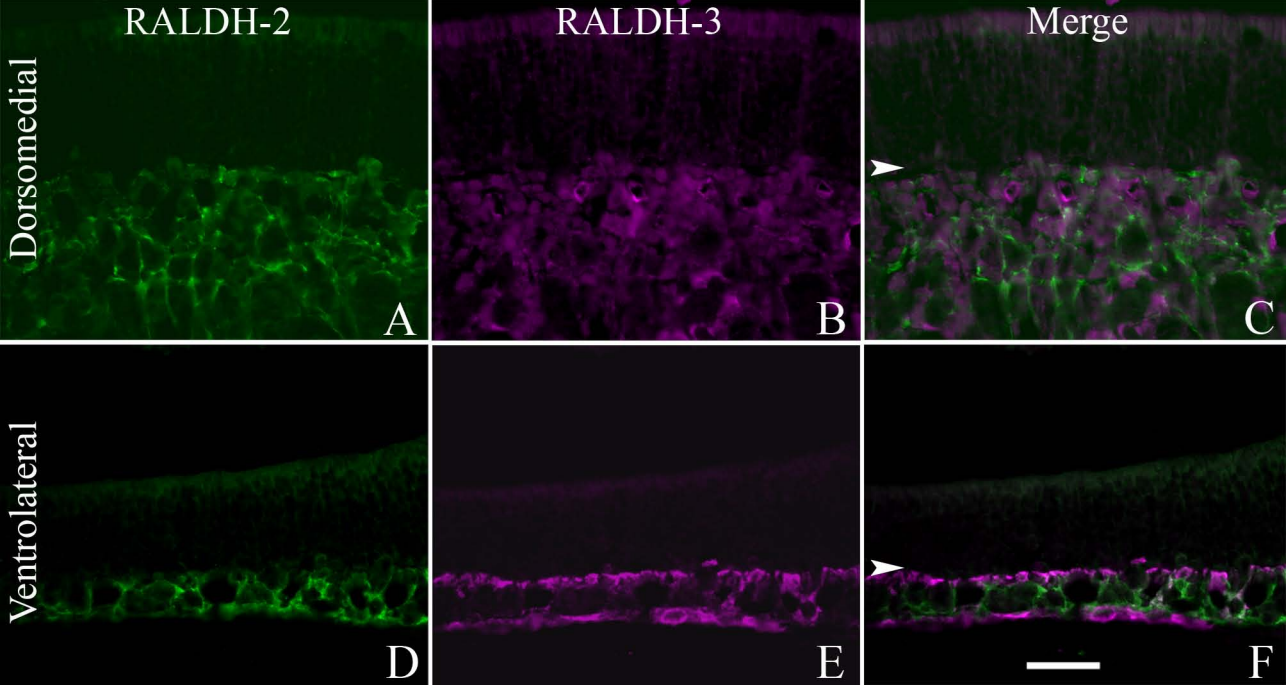

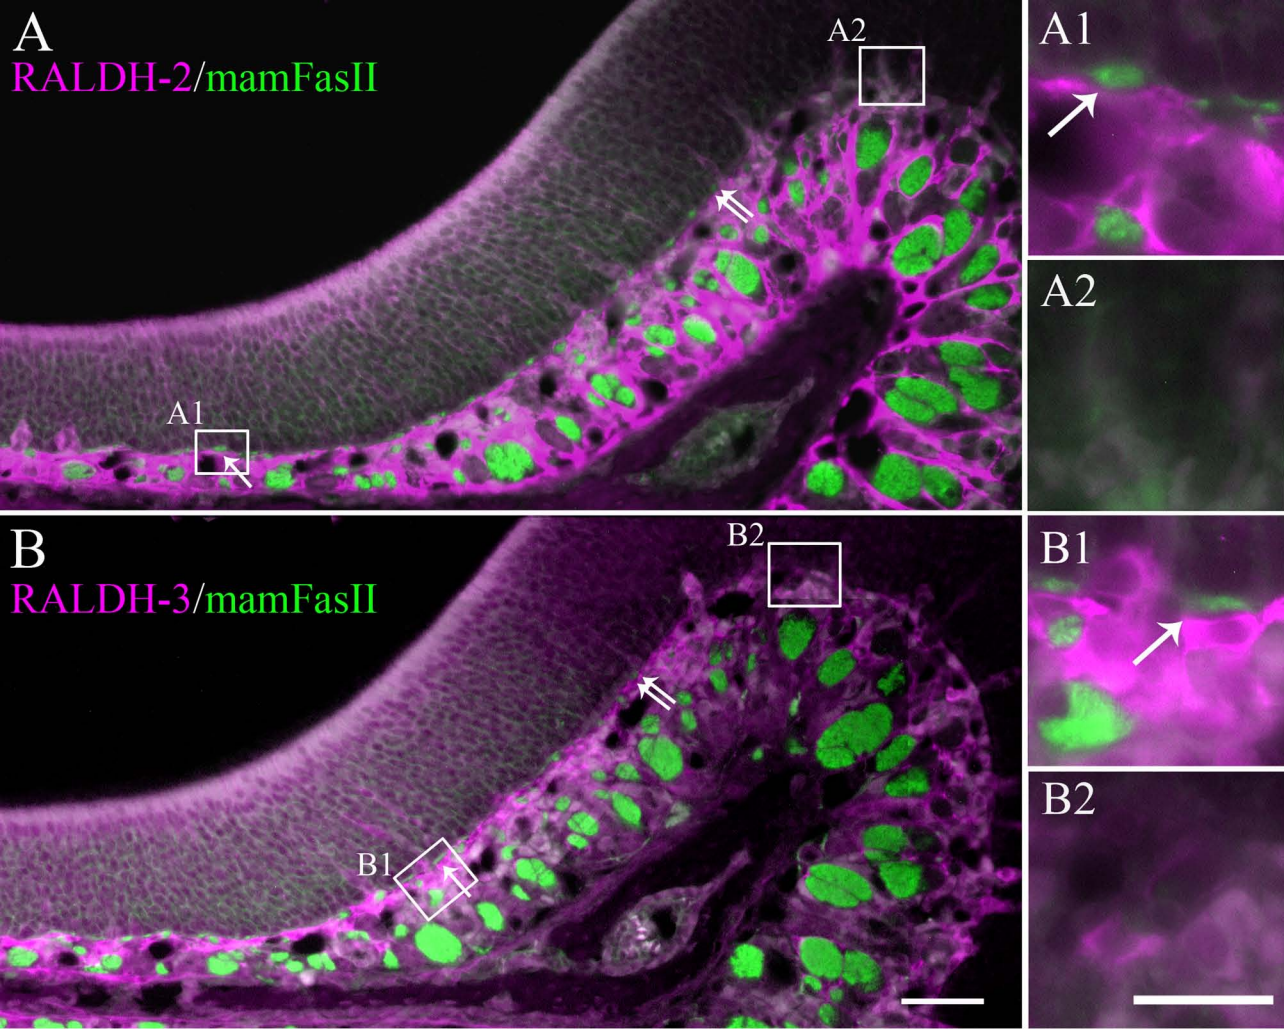

RALDH-2/CD54

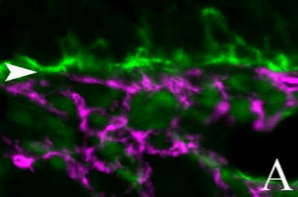

RALDH-3/CD54

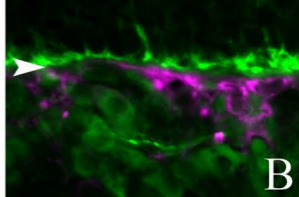

RALDH-2/PGP9.5

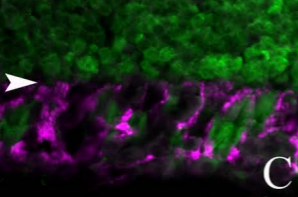

RALDH-3/PGP9.5

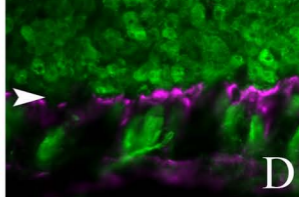

RALDH-2/p75

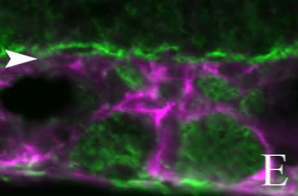

RALDH-3/p75

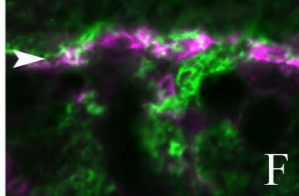

RALDH-2/F480

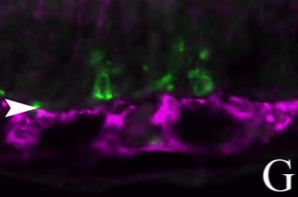

RALDH-3/F480

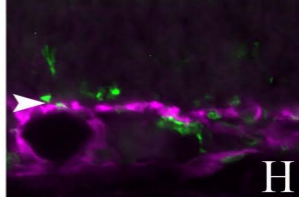

RALDH-2/CD31

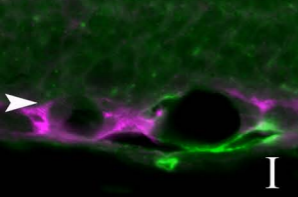

RALDH-3/CD31

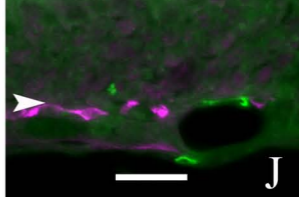

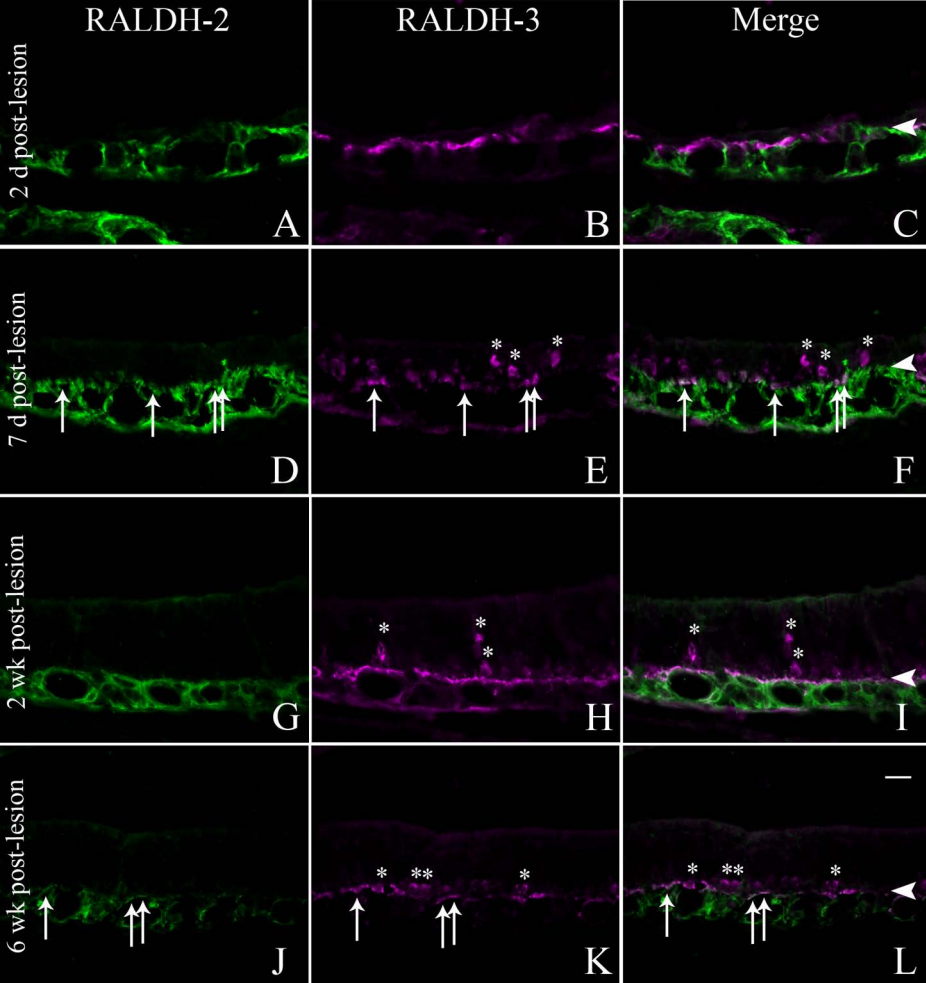

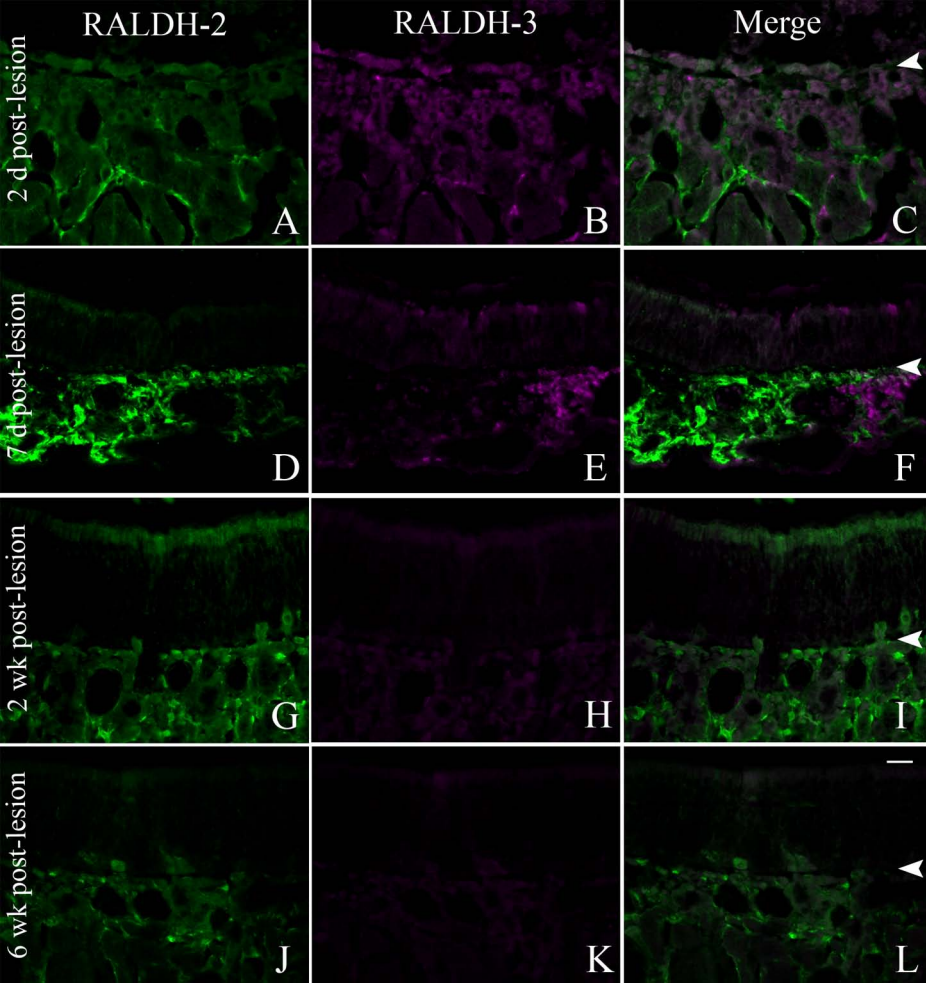

Supplement: NIHMS446557-supplement-supplementary_figures.pdf [file NIHMS446557-supplement-supplementary_figures.pdf]
